# Supplementary material for: Anisotropic magnetoresistance and electronic features of the candidate topological compound praseodymium monobismuthide
Source: Royal Society of Chemistry journal article supplement (doi:10.1039/d3cp03480a), 2023-01-01
Supplement: d3cp03480a1.pdf [file d3cp03480a1.pdf]

## Supplemental Materials

### **Anisotropic magnetoresistance and electronic features of the candidate topological compound praseodymium monobismuthide**

F. Tang<sup>a, b, 1</sup>, Y. Chen<sup>a, b, 1</sup>, X. -L. Ge<sup>b</sup>, W. -Z. Meng<sup>c</sup>, Z. -D. Han<sup>b</sup>, B. Qian<sup>b</sup>, W. Zhao<sup>d</sup>, X. -F. Jiang<sup>b</sup>, Y. Fang<sup>b, \*</sup>, and  
S. Ju<sup>a, \*</sup>

<sup>a</sup> Jiangsu Key Laboratory of Thin Films, School of Physical Science and Technology, Soochow University, Suzhou 215006, China

<sup>b</sup> Jiangsu Laboratory of Advanced Functional Materials, School of Electronic and information Engineering, Changshu Institute of Technology, Changshu 215500, China

<sup>c</sup> School of Materials Science and Engineering, Hebei University of Technology, Tianjin 300130, China

<sup>d</sup> Department of Materials Science and Engineering, Monash University, Clayton VIC 3800, Australia

Figure S1

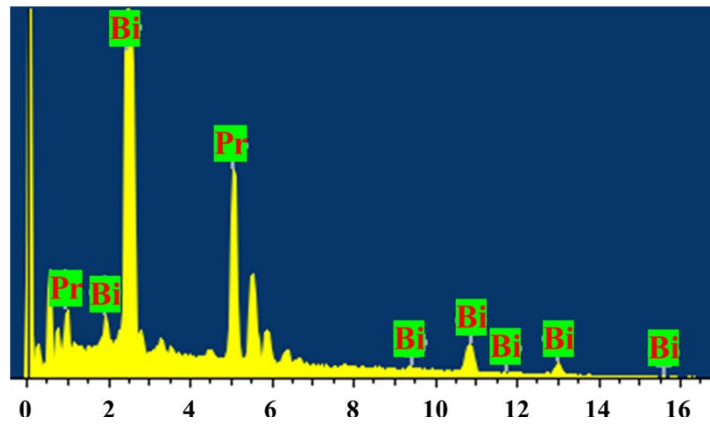

Fig. S1 EDS for our PrBi single crystal.

Figure S2

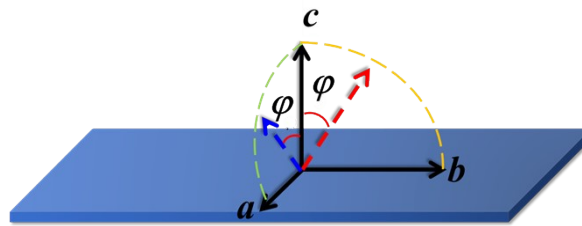

Fig. S2 Sketch of the experimental setups for angular dependent magnetoresistance measurements.

Figure S3

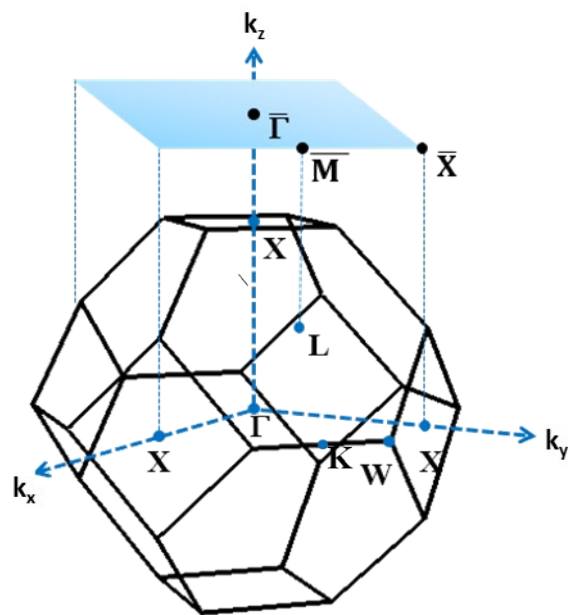

Fig. S3 Bulk Brillouin zone and the (001)-projected surface Brillouin zone.
